# Supplementary material for: Crystalline phase induced Raman enhancement on molybdenum carbides
Source: Royal Society of Chemistry journal article supplement (doi:10.1039/d2qi00543c), 2022-01-01
Supplement: d2qi00543c1.pdf [file d2qi00543c1.pdf]

## Electronic Supplementary Information

### Crystalline phase induced Raman enhancement on molybdenum carbide

Mengxin Chen<sup>a,b,‡</sup>, Chuqiao Song<sup>c,‡</sup>, Ce Liang<sup>b</sup>, Bin Zhang<sup>b</sup>, Yanchun Sun<sup>\*a</sup>, Siwei Li<sup>\*d</sup>, Lili Lin<sup>\*c</sup> and  
Ping Xu<sup>\*b</sup>

a. Heilongjiang River Fisheries Research Institute of Chinese Academy of Fishery Sciences/Laboratory of Quality & Safety Risk Assessment for Aquatic Products (Harbin), Ministry of Agriculture and Rural Areas, Harbin 150070, China. Email: sunyc2004@163.com (Y.S.)

b. MIIT Key Laboratory of Critical Materials Technology for New Energy Conversion and Storage, School of Chemistry and Chemical Engineering, Harbin Institute of Technology, Harbin 150001, China. Email: pxu@hit.edu.cn (P.X.)

c. Institute of Industrial Catalysis, State Key Laboratory of Green Chemistry Synthesis Technology, College of Chemical Engineering, Zhejiang University of Technology, Hangzhou 310014, Zhejiang, China. Email: linll@sjut.edu.cn (L.L.)

d. Institute of Industrial Catalysis, School of Chemical Engineering and Technology, Xi'an Jiaotong University, Xi'an 710049, China. Email: lisiwei@xjtu.edu.cn (S.L.)

‡ These authors contributed equally.

## Contents

Density functional theory calculation details

- Fig. S1** XRD pattern and Raman spectroscopy of MoO<sub>3</sub> precursor.
- Fig. S2** SEM images of  $\alpha$ -MoC and  $\beta$ -Mo<sub>2</sub>C.
- Fig. S3** SEM image of MoO<sub>3</sub> precursor.
- Fig. S4** TEM and HRTEM images of MoO<sub>3</sub> precursor.
- Fig. S5** AFM images of  $\alpha$ -MoC and  $\beta$ -Mo<sub>2</sub>C.
- Fig. S6** Survey XPS for  $\alpha$ -MoC and  $\beta$ -Mo<sub>2</sub>C.
- Fig. S7** Obtained SERS signals of MB from  $\alpha$ -MoC,  $\beta$ -Mo<sub>2</sub>C and SiO<sub>2</sub>/Si substrates.
- Fig. S8** SERS of R6G, CV and MB molecules obtained from different positions on  $\alpha$ -MoC and  $\beta$ -Mo<sub>2</sub>C.
- Fig. S9** SERS of different probe molecules adsorbed on  $\alpha$ -MoC and  $\beta$ -Mo<sub>2</sub>C.
- Fig. S10** UV-visible absorption spectra of  $\alpha$ -MoC and  $\beta$ -Mo<sub>2</sub>C.
- Fig. S11** R6G molecules (10<sup>-3</sup> M) and R6G (10<sup>-4</sup> M) adsorbed onto  $\alpha$ -MoC and  $\beta$ -Mo<sub>2</sub>C.
- Fig. S12** Work functions of  $\alpha$ -MoC and  $\beta$ -Mo<sub>2</sub>C by DFT calculations.
- Fig. S13** Influence of changing excitation wavelength on SERS effect.
- Fig. S14** Raman enhancement factors of  $\alpha$ -MoC and  $\beta$ -Mo<sub>2</sub>C.

Calculation of enhancement factor

## Density Functional Theory Calculations

Density Functional Theory (DFT) calculations were performed on the Vienna Ab initio Simulation Package (VASP) by using the PBE exchange-correlation function.<sup>1-3</sup> The interaction between valence electrons and the ionic core was described by the PAW pseudo-potential. The geometry structures were optimized with the cut off energy of 550 eV. All the atomic positions were allowed to relax until the magnitude of all residual forces was less than 0.02 eV. The Monkhorst-Pack k-point mesh of  $13 \times 13 \times 13$  was used to calculate the geometry optimization and PDOS. The VASPKIT code was used to analyse data.

## Supplementary Figures

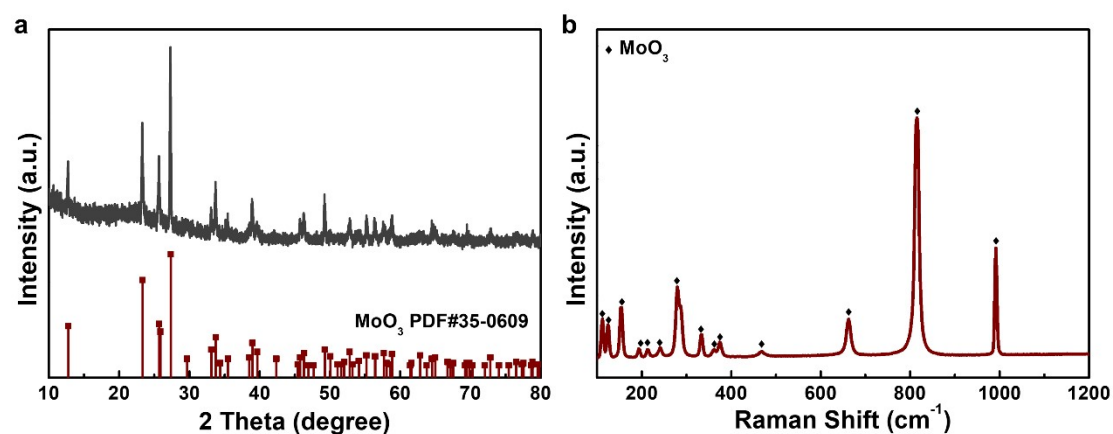

**Fig. S1.** (a) XRD pattern of the MoO<sub>3</sub> precursor. (b) Raman spectroscopy of MoO<sub>3</sub> precursor.

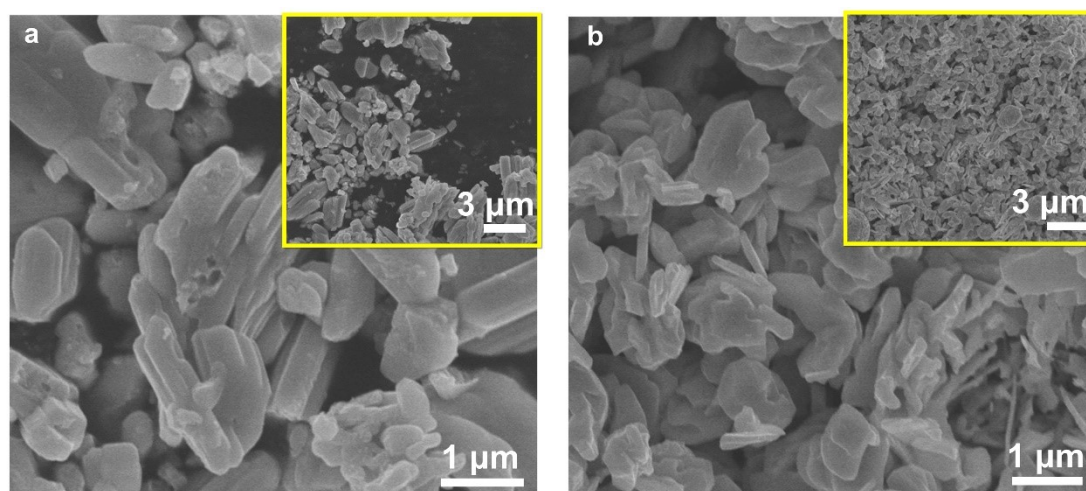

**Fig. S2.** SEM images of  $\alpha$ -MoC and  $\beta$ -Mo<sub>2</sub>C.

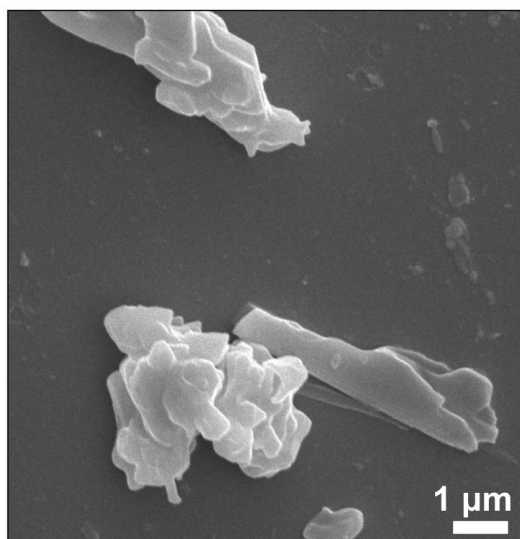

**Fig. S3.** SEM image of MoO<sub>3</sub> precursor prepared by calcination of (NH<sub>4</sub>)<sub>7</sub>Mo<sub>7</sub>O<sub>24</sub>·4H<sub>2</sub>O.

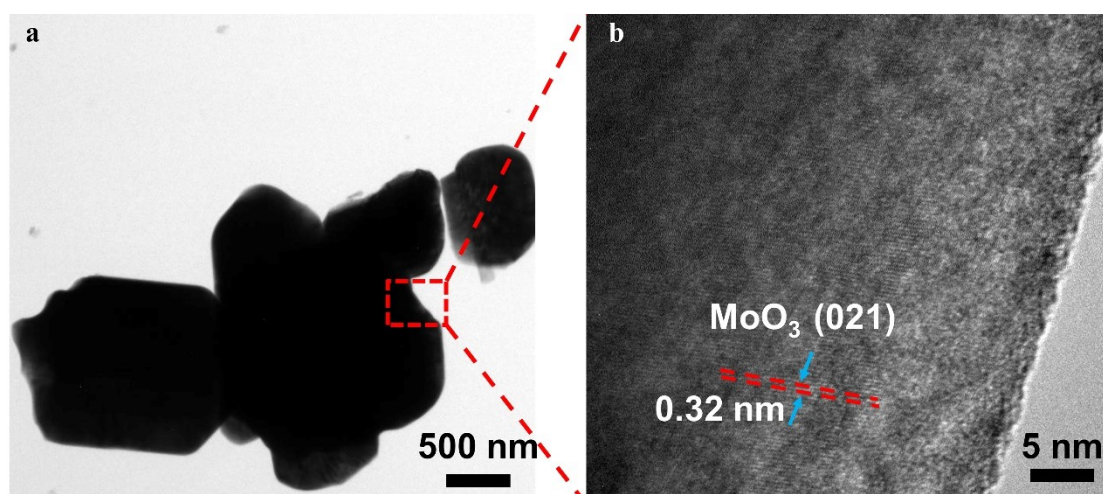

**Fig. S4.** TEM (a) and HRTEM (b) images of MoO<sub>3</sub> precursor.

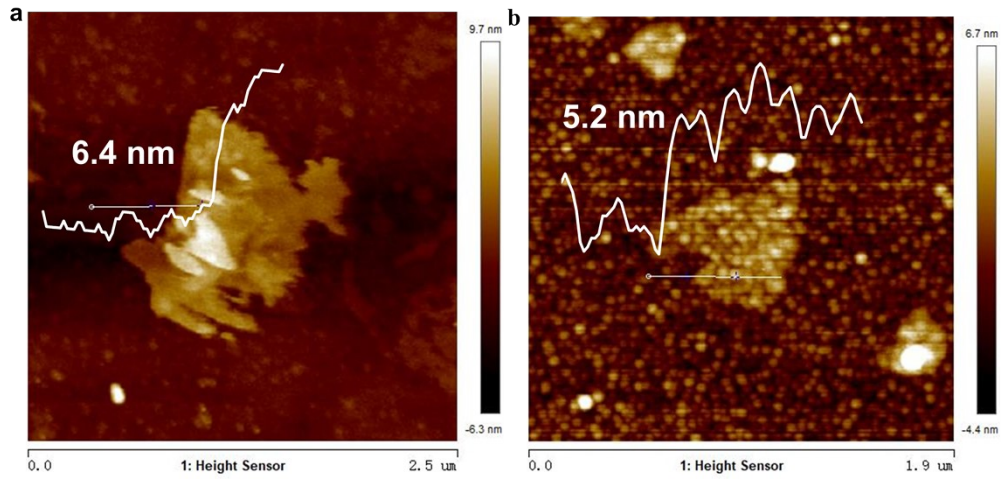

Fig. S5. AFM images of (a)  $\alpha$ -MoC; (b)  $\beta$ -Mo<sub>2</sub>C.

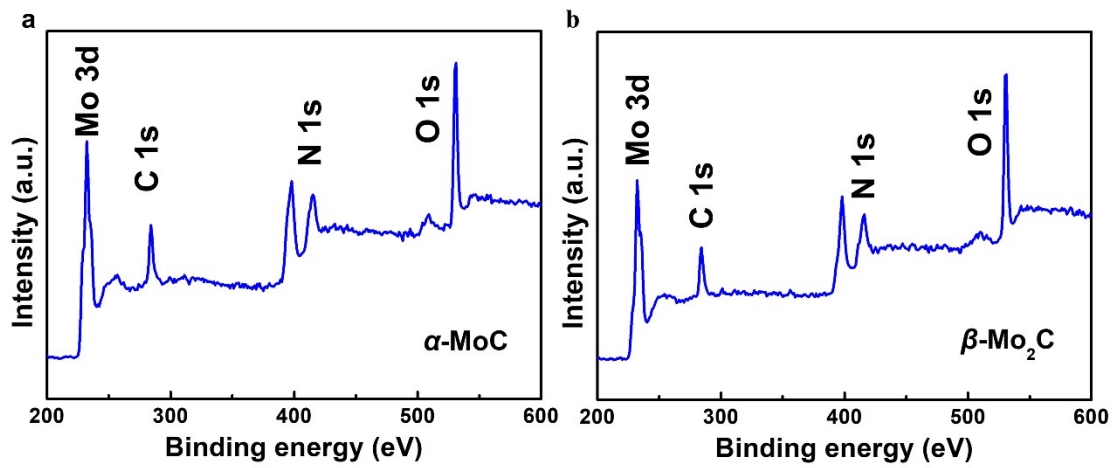

Fig. S6. Survey XPS for (a)  $\alpha$ -MoC and (b)  $\beta$ -Mo<sub>2</sub>C.

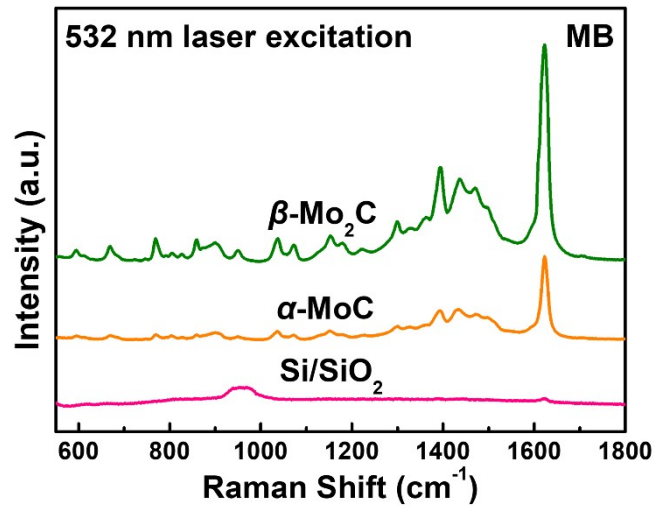

**Fig. S7.** Obtained SERS signals of MB from  $\alpha\text{-MoC}$ ,  $\beta\text{-Mo}_2\text{C}$  and SiO<sub>2</sub>/Si substrates, respectively.

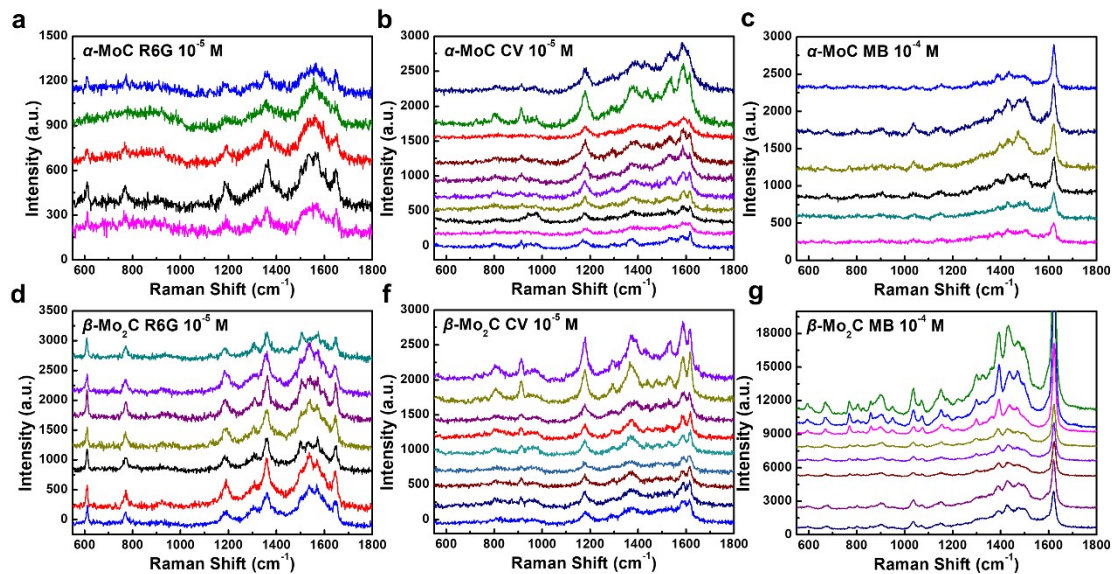

**Fig. S8.** SERS of (a, d) R6G, (b, f) CV and (c, g) MB molecules obtained from different positions on  $\alpha\text{-MoC}$  and  $\beta\text{-Mo}_2\text{C}$ , respectively.



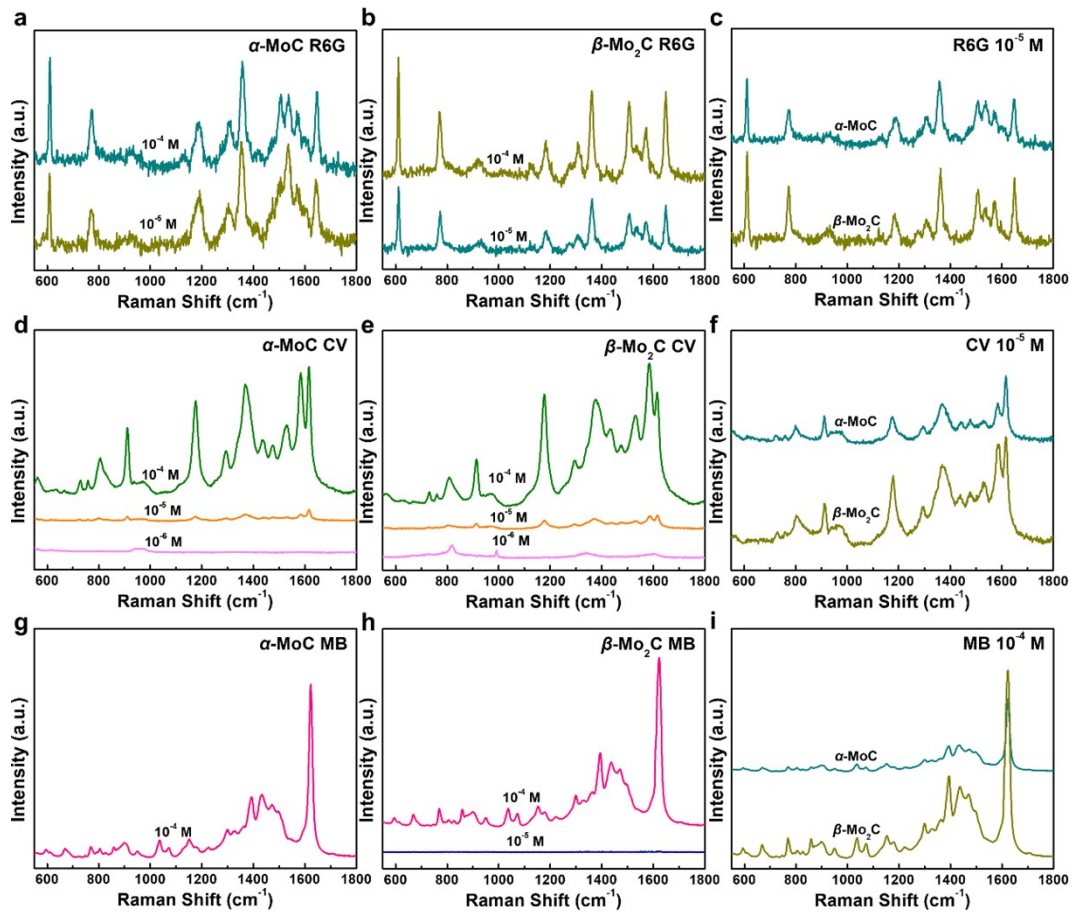

**Fig. S9.** SERS of different probe molecules adsorbed on  $\alpha$ -MoC and  $\beta$ -Mo<sub>2</sub>C. (a-c) R6G; (d-f) CV; (g-i) MB.

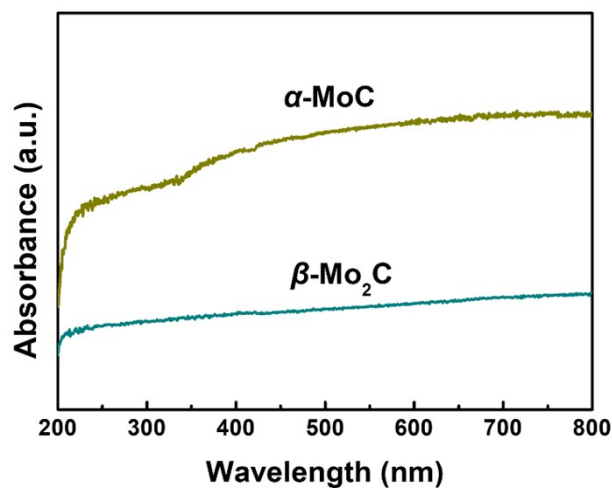

**Fig. S10.** UV-visible absorption spectra of  $\alpha$ -MoC and  $\beta$ -Mo<sub>2</sub>C. (During the test, the powder sample was put into a glass groove, and the surface was pressed flat with a glass sheet. The test range was 200-800 nm, and the scanning rate was 300 nm min<sup>-1</sup>).

1.)

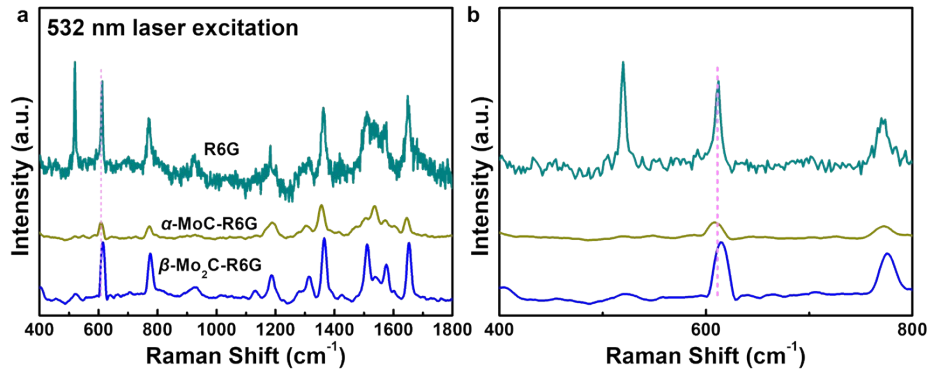

**Fig. S11.** (a) Raman Spectra of R6G molecules ( $10^{-3}$  M) and R6G ( $10^{-4}$  M) adsorbed onto  $\alpha$ -MoC and  $\beta$ -Mo<sub>2</sub>C.<sup>4-7</sup> (b) Enlarged part from 400-800  $\text{cm}^{-1}$ .

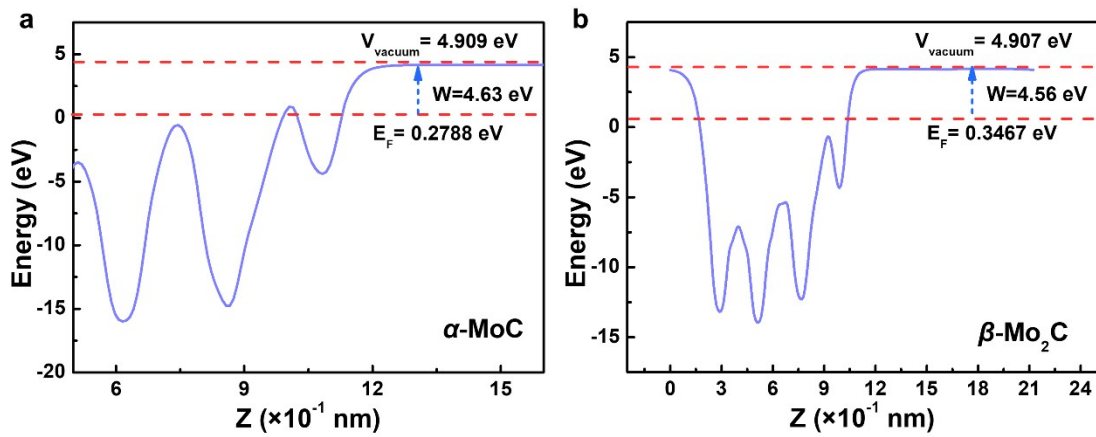

**Fig. S12.** Work functions of  $\alpha$ -MoC (a) and  $\beta$ -Mo<sub>2</sub>C (b) by DFT calculations.

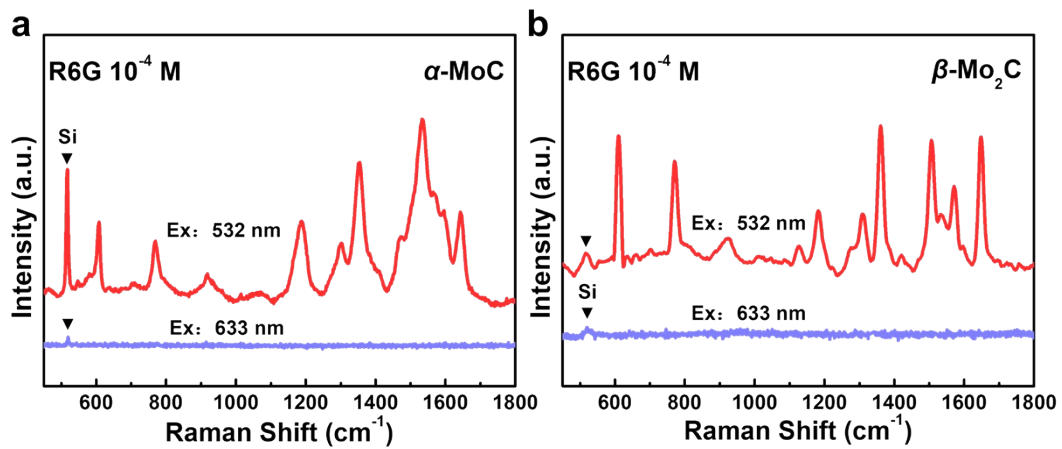

**Fig. S13.** Influence of changing excitation wavelength on SERS effect (a)  $\alpha$ -MoC; (b)  $\beta$ -Mo<sub>2</sub>C.



## Calculation of enhancement factor

The enhancement factor was calculated according to the following equation<sup>4</sup>:

$$EF = (I_{SERS} / N_{SERS}) / (I_{NR} / N_{NR})$$

where  $I_{SERS}$  and  $I_{NR}$  are the Raman intensities of MB molecule on substrate and that without substrate (Si substrate in this study).  $N_{SERS}$  is the number of molecules absorbed on the molybdenum carbide substrate within the laser spot area, and  $N_{NR}$  stands for the number of molecules excited on the Si substrate. In order to obtain the value of  $N_{NR}$ , 100  $\mu\text{L}$  of probe molecules solution (1 mM) was dropped onto the Si wafer ( $0.5 \times 0.5 \text{ cm}^2$ ).  $N_{NR}$  can be estimated by the following equation:

$N_{NR} = c_{NR} V (A_{\text{beam}}/A) N_A$  where  $A_{\text{beam}} = \pi(d/2)^2$  is the area of the focal spot of the laser,  $d$  is the diameter of the light spot estimated by  $d = 1.22 \lambda/\text{NA}$ ,  $\lambda$  is the incident laser wavelength, i.e., 532 nm, and the numerical aperture (NA) of the objective lens NA = 0.75. Thereby, laser spot size is approximately  $1.87 \mu\text{m}^2$ .  $A$  is the area of probe molecules layer which equal to the area of Si wafer ( $0.25 \text{ cm}^2$ ).  $N_A$  stands for Avogadro's constant. Therefore,  $N_{NR}$  equals to:

$$N_{NR} = 40 \mu\text{L} \times 0.001 \text{ mol / L} \times 0.59 \mu\text{m}^2 / 0.25 \text{ cm}^2 \times 6.02 \times 10^{23} \text{ mol}^{-1} = 5.68 \times 10^8$$

Moreover,  $N_{SERS}$  is the number of absorbed molecules scattered in the area of laser beam, which can be estimated by the following equation:  $N_{SERS} = A_{\text{beam}}/\sigma$  where  $\sigma$  is the area occupied by a molecule of adsorbent at monolayer coverage, which is estimated to  $\sim 0.5 \text{ nm}^2$ . It should be mentioned that the surface coverage must remain smaller than one monolayer when using this equation. The concentration of the probe molecules solution was controlled lower than  $1 \times 10^{-4} \text{ M}$  to prevent the supersaturation adsorption of probe molecule onto molybdenum carbide substrate.  $N_{SERS}$  is calculated to be  $1.18 \times 10^6$ .

The intensity at  $1626 \text{ cm}^{-1}$  of MB molecule on Si and the intensity at  $1624 \text{ cm}^{-1}$  on molybdenum carbide substrate were used to calculate EF values. Here  $I_{SERS} = 5338$  and

13200 of  $\alpha$ -MoC and  $\beta$ -Mo<sub>2</sub>C, respectively, and  $I_{NR} = 5300$  (**Fig. S14**). By substituting these values into the equation, EF of  $\alpha$ -MoC and  $\beta$ -Mo<sub>2</sub>C are calculated to be  $3.6 \times 10^2$  and  $1 \times 10^3$ , respectively.

The intensity at 609 cm<sup>-1</sup> of R6G molecule on Si and the intensity at 609 cm<sup>-1</sup> on molybdenum carbide substrate were used to calculate EF values. Here  $I_{SERS} = 400$  and 1500 of  $\alpha$ -MoC and  $\beta$ -Mo<sub>2</sub>C, respectively, and  $I_{NR} = 1800$  (**Fig. S14**). By substituting these values into the equation, EF of  $\alpha$ -MoC and  $\beta$ -Mo<sub>2</sub>C are calculated to be  $1.2 \times 10^2$  and  $4 \times 10^2$ , respectively.

The intensity at 1176 cm<sup>-1</sup> of CV molecule on Si and the intensity at 1176 cm<sup>-1</sup> on molybdenum carbide substrate were used to calculate EF values. Here  $I_{SERS} = 2800$  and 4800 of  $\alpha$ -MoC and  $\beta$ -Mo<sub>2</sub>C, respectively, and  $I_{NR} = 2400$  (**Fig. S14**). By substituting these values into the equation, EF of  $\alpha$ -MoC and  $\beta$ -Mo<sub>2</sub>C are calculated to be  $6 \times 10^2$  and  $1 \times 10^3$ , respectively.

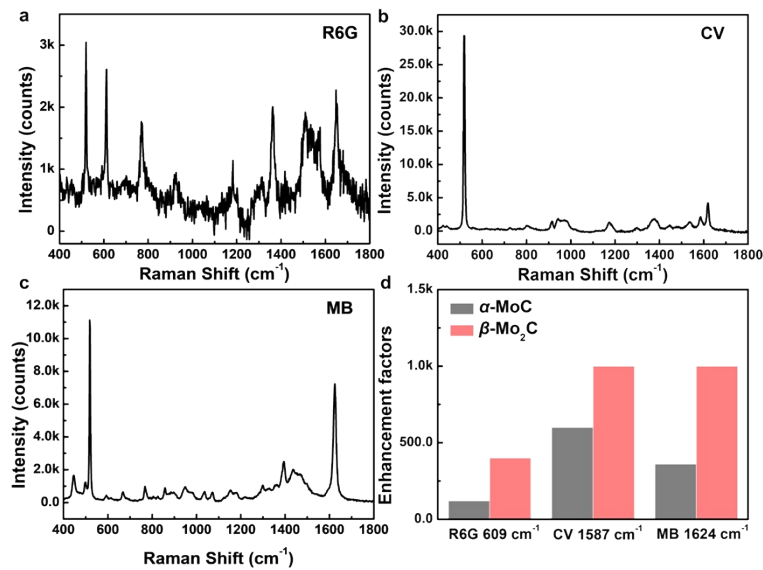

**Fig. S14.** Raman enhancement factors of  $\alpha$ -MoC and  $\beta$ -Mo<sub>2</sub>C.

## Reference :

1. Kresse G., Furthmuller J, Efficient Iterative Schemes for ab-initio Total Energy Calculations Using a Plane-wave Basis Set, *Phys. Rev. B*, 1996, 54(16): 11169-11186.
2. Blöchl P. E., Projector Augmented-Wave Method, *Phys. Rev. B*, 1994, 50(24): 17953-17979.
3. Perdew J. P., Burke K., Ernzerhof M., Generalized Gradient Approximation Made Simple, *Phys. Review Lett.*, 1996, 77(18): 3865-3868.
4. X. Wang, W. Shi, Z. Jin, W. Huang, J. Lin, G. Ma, S. Li, L. Guo, Remarkable SERS Activity Observed from Amorphous ZnO Nanocages, *Angew. Chem. Int. Ed.* 2017, 56, 9851.
5. Jiang L, You T, Yin P, Y Shang, D Zhang, L Guo and S Yang, Surface-enhanced Raman scattering spectra of adsorbates on Cu<sub>2</sub>O nanospheres: charge-transfer and electromagnetic enhancement, *Nanoscale*, 2013, 5(7):2784.
6. John R. Lombardi and Ronald L. Birke, Quantum Biological Switch Based on Superradiance Transitions, *J. Phys. Chem. C.* 2014, 118, 20, 11120–11130.
7. Y. Ye, C. Chen, H. Bai, W. Liu, W. Li, J. Li, W. Yi and G. Xi, Quasi-metallic Tungsten Oxide Nanodendrites with High Stability for Surface Enhanced Raman Scattering, *Cell Reports Physical Science*, 2020, 1, 100031.
